# Supplementary material
Source: publisher site journal article supplement (https://www.dovepress.com/get_supplementary_file.php?f=346294.docx)
Supplement: Supplementary file 1 [file get_supplementary_file.php]

**Increased long-term risk of mortality associated with isolation of *Pseudomonas aeruginosa* in COPD: a systematic review and meta-analysis**

**Supplementary material**

**Table S1. Detailed bibliographic search strategy**

| **MEDLINE (PubMed)** 21/12/2021 |
| --- |
| #1 "Pulmonary Disease, Chronic Obstructive"[Mesh]  #2 chronic obstructive pulmonary disease[tiab]  #3 COPD[tiab]  #4 AECOPD[tiab]  #5 #1 OR #2 OR #3 OR #4  #6 "Pseudomonas Infections"[Mesh]  #7 "Pseudomonas aeruginosa"[Mesh]  #8 pseudomona*[tiab]  #9 P aeruginosa[tiab]  #10 #6 OR #7 OR #8 OR #9  **#11 #5 AND #10** |

| **Embase (embase.com)** 21/12/2021 |
| --- |
| #1 'chronic obstructive lung disease'/exp  #2 'chronic obstructive pulmonary disease':ti,ab  #3 copd:ti,ab  #4 aecopd:ti,ab  #5 #1 OR #2 OR #3 OR #4  #6 'pseudomonas infection'/exp  #7 'pseudomonas aeruginosa'/exp  #8 pseudomona*:ti,ab  #9 'p aeruginosa':ti,ab  #10 #6 OR #7 OR #8 OR #9  **#11 #5 AND #10** |

##

**Supplementary material 1. Template of QUIPS adaptations with respect to Hayden original proposal**

The rationale behind the adaptation of QUIPS tool signalling questions is detailed below.

**1. Study Participation**

The signalling question *“Population of interest: Severity of the condition and criteria to define it”* include the original items *“Adequate participation in the study by eligible persons”* and *“Description of the source population or population of interest”*. The reviewers considered that the study sample adequately represents the COPD population of interest if the diagnostic criteria and severity are well described.

The signalling questions *“Adequate description of the period and place of recruitment”* was considered to also answer *“Adequate description of the sampling frame and recruitment”*

**2. Study Attrition**

No modifications were made to the original questions

**3. Prognostic Factor Measurement**

The signalling questions *“Continuous variables are reported or appropriate cut points are used”* and *“Appropriate methods of imputation are used for missing PF data”* were not used. The considered prognostic factor “presence of Pseudomonas aeruginosa in airways” is a binary (YES/NOT) condition and cut points and imputation of missing data are nor relevant.

**4. Outcome Measurement**

No modifications were made to the original questions

**5. Study Confounding**

The wording of the signalling questions *“All important confounders are measured, accounted for in the analysis and in the study design”* consider and include the following three independent items: *“All important confounders are measured”*; *“Important potential confounders are accounted for in the study design”*; *“Important potential confounders are accounted for in the analysis”*.

**6. Statistical Analysis and Reporting**

It was considered that the signalling questions *“Sufficient presentation of data (including the statistical model) to assess the adequacy of the analytic strategy”* summarised and was representative of the following QUIPS items: *“Sufficient presentation of data to assess the adequacy of the analytic strategy”*; *“Strategy for model building is appropriate and is based on a conceptual framework or model”*; *“The selected statistical model is adequate for the design of the study”*

We anticipated finding few or no studies including a conceptual framework / statistical model in their methods thus the wording of the item was simplified.

Table S2a. QUIPS Tool template

| **Study Participation** | | | | **Study Attrition** | | | | |
| --- | --- | --- | --- | --- | --- | --- | --- | --- |
| **The study sample adequately represents the population of interest.** | | | | **The study data available (i.e. participants not lost to follow-up) adequately represent the study sample** | | | | |
| *Population of interest: Severity of the condition and criteria to define it (1)* | *Description of the baseline study sample* | *Adequate description of the period and place of recruitment (2)* | *Adequate description of inclusion and exclusion criteria* | *Adequate response rate for study participants* | *Description of attempts to collect information on participants who dropped out* | *Reasons for loss to follow-up are provided* | *Adequate description of participants lost to follow-up* | *There are no important differences between participants who completed the study and those who did not* |

1. The item summarises QUIPS questions: “Adequate participation in the study by eligible persons”; “Description of the source population or population of interest”

2. The following QUIPS questions was not used: “Adequate description of the sampling frame and recruitment”

| **Prognostic Factor Measurement** | | | | **Outcome Measurement** | | |
| --- | --- | --- | --- | --- | --- | --- |
| **The PF is measured in a similar way for all participants (3)** | | | | **The outcome of interest is measured in a similar way for all participants** | | |
| *A clear definition or description of the PF is provided* | *Method of PF measurement is adequately valid and reliable* | *The method and setting of measurement of PF is the same for all study participants* | *Adequate proportion of the study sample has complete data for the PF* | *A clear definition of the outcome is provided* | *Method of outcome measurement used is adequately valid and reliable* | *The method and setting of outcome measurement is the same for all study participants* |

1. The following QUIPS questions were not used: “Continuous variables are reported or appropriate cut points are used”; “Appropriate methods of imputation are used for missing PF data”

| **Study Confounding** | | | | **Statistical Analysis and Reporting** | |
| --- | --- | --- | --- | --- | --- |
| **Important potential confounding factors are appropriately accounted for** | | | | **The statistical analysis is appropriate, and all primary outcomes are reported** | |
| *All important confounders are measured, accounted for in the analysis and in the study design (4)* | *Clear definitions of the important confounders measured are provided* | *Measurement of all important confounders is adequately valid and reliable* | *The method and setting of confounding measurement are the same for all study participants* | *Sufficient presentation of data (including the statistical model) to assess the adequacy of the analytic strategy (5)* | *There is no selective reporting of results* |

1. The item summarises QUIPS questions: “All important confounders are measured”; “Important potential confounders are accounted for in the study design / analysis”
2. The item summarises QUIPS questions: “Sufficient presentation of data to assess the adequacy of the analytic strategy”; “Strategy for model building is appropriate and is based on a conceptual framework or model”; “The selected statistical model is adequate for the design of the study”

## Table S2b. Detailed results of QUIPS assessment

|  | *Study participants* | | | | | *Study attrition* | | | | | | *Prognostic factor measurement* | | | | | *Outcome measurement - exacerbations* | | | | *Outcome measurement - hospitalization* | | | | *Outcome measurement - death* | | | | *Study confounding* | | | | | *Statistical analysis & reporting* | | |
| --- | --- | --- | --- | --- | --- | --- | --- | --- | --- | --- | --- | --- | --- | --- | --- | --- | --- | --- | --- | --- | --- | --- | --- | --- | --- | --- | --- | --- | --- | --- | --- | --- | --- | --- | --- | --- |
| *Study* | *Inclusion* | *Char* | *Severity* | *Recruitment* | *Assessment* | *Motives* | *Participants* | *Differences* | *Methods* | *Rate* | *Assessment:* | *Definition* | *Validated* | *Methods* | *Proportion* | *Assessment* | *Definition* | *Validated* | *Methods* | *Assessment* | *Definition* | *Validated* | *Methods* | *Assessment* | *Definition* | *Validated* | *Methods* | *Assessment* | *Measured* | *Definition* | *Reliable* | *Same* | *Assessment* | *Characteristics* | *Absence* | *Assessment* |
| Almagro | Y | Y | Y | Y | L | Y | Y | NR | Y | Y | L | Y | Y | NR | Y | L | -- | -- | -- | -- | Y | NR | NR | M | Y | Y | N | M | N | Y | Y | N | H | Y | Y | L |
| Bouquet | Y | Y | Y | Y | L | NR | NR | NR | NR | NR | M | Y | Y | NR | NR | L | N | NR | NR | M | -- | -- | -- | -- | -- | -- | -- | -- | N | NR | NR | N | H | Y | Y | L |
| Boutou | NR | Y | NR | Y | M | N | N | N | NR | N | H | N | NR | NR | NR | L | -- | -- | -- | -- | -- | -- | -- | -- | N | NR | NR | M | N | NR | NR | N | H | NR | N | M |
| Choi | Y | Y | Y | Y | L | Y | Y | NR | NR | Y | M | N | Y | Y | Y | L | -- | -- | -- | -- | Y | NR | NR | M | -- | -- | -- | -- | N | NR | NR | N | H | Y | Y | L |
| Eklöf | Y | Y | NR | Y | L | Y | Y | NR | Y | Y | L | Y | Y | Y | Y | L | -- | -- | -- | -- | Y | Y | Y | L | Y | Y | Y | L | Y | NR | NR | N | M | Y | Y | L |
| Jacobs | Y | Y | NR | Y | L | Y | Y | Y | Y | Y | L | Y | NR | Y | NR | L | Y | Y | Y | L | N | NR | NR | M | N | NR | NR | M | Y | NR | NR | N | M | Y | Y | L |
| Martínez-García | Y | Y | Y | Y | L | Y | NR | NR | Y | Y | L | Y | Y | Y | Y | L | Y | Y | Y | L | Y | NR | NR | M | N | NR | NR | M | Y | Y | Y | Y | L | Y | Y | L |
| Rodrigo-Troyano | Y | Y | Y | Y | L | Y | Y | Y | Y | N | M | Y | Y | Y | Y | L | xxx | xxx | xxx |  | Y | NR | NR | M | Y | Y | Y | L | N | NR | NR | NR | H | Y | Y | L |

## Table S3. Characteristics of included studies

### Almagro 2012

| **Study ID** | **Almagro 2012** |
| --- | --- |
| **Objective** | To determine whether PA isolation during hospitalization for COPD exacerbation was associated with a poorer prognosis after discharge independently of other well-known mortality predictors. |
| **Design** | Prospective study |
| **Study participation** | Study population:  Cohort of consecutively patients (n=181) hospitalized for acute exacerbation of COPD, followed for up to 3 years after discharge.  COPD exacerbation was defined according to the Anthonisen criteria (increased dyspnoea, sputum volume and sputum purulence).  Inclusion criteria:  Hospitalization in a medical ward for acute exacerbation of COPD and baseline forced spirometry showing FEV1 ≤ 70% of the reference value and beta2-agonist reversibility of predicted FEV1 of < 15% and/or 200 ml with FEV1/forced vital capacity <70%.  Exclusion criteria:  A history of asthma or bronchiectasis as a predominant illness, pneumonia or pulmonary oedema at admission, hospitalization for causes other than acute exacerbation of COPD and patient refusal to participate in the study. Patients who died during initial admission were also excluded.  Recruitment period and setting:  All patients were recruited between June 2003 and September 2004.  The study was carried out in a 500-bed university hospital in the province of Barcelona, Spain. |
| **Follow-up and data collection** | Comorbidity, functional dependence, hospitalizations during the previous year, dyspnoea, quality of life and other variables previously associated with mortality in COPD were studied and assessed at initial visit. |
| **Prognostic Factor**  **Measurement** | A sputum culture was obtained at admission and before antibiotic administration. Sputum induction was performed using the usual methods, with a 3% saline nebulizer and respiratory physiotherapy, when required. Only good quality samples ( < 10 squamous epithelial cells and > 25 leukocytes per field) were accepted for processing. Sputum samples were processed microbiologically for semi quantitative culture following accepted laboratory methods (MacConkey agar under aerobic conditions and in chocolate agar and blood agar in an atmosphere containing 5-7% CO2.  Bacterial agents were classified into potential pathogenic microorganisms and non-pathogenic microorganisms. Only pathogenic microorganisms were evaluated. |
| **Outcome measurement** | Mortality (and respiratory causes of death) was evaluated 3 years after discharge and was ascertained by means of telephone contact (with the patient or family) and/or checking hospital records and the Death Register of Catalonia.  Number of readmissions was assessed up to 1 year after discharge.  Spirometry was performed 1 month after discharge. |
| **Statistical analysis** | Multivariate Cox proportional hazard regression models (graphically with Kaplan-Meier curves)  Adjusted analysis for known and suspected confounders: Age, BODE index, comorbidity (Charlson index) |

### Bouquet 2020

| **Study ID** | **Bouquet 2020** |
| --- | --- |
| **Objective** | To determine the influence of viral infections on the frequency of exacerbations. |
| **Design** | Prospective study |
| **Study participation** | Study population:  Cohort of stable severe COPD outpatients (n=200), followed longitudinally for 3 years.  The patient cohort is part of an observational study on the incidence of acute respiratory illness (ARI) or events leading to the worsening of cardiorespiratory status in COPD (ClinicalTrials.gov, NCT01455402)  Inclusion criteria:  NR  Exclusion criteria:  NR  Recruitment period and setting:  The study population included adults ≥50 years of age with COPD, recruited at 6 sites in Bulgaria, 5 sites in Czech Republic, and 14 sites across the USA from fall 2011 to spring 2014. |
| **Follow-up and data collection** | Subjects had scheduled wellness visits in May and October each year to obtain sputum and clinical data. Unscheduled illness visits to collect sputum and clinical data were performed when a subject experienced an ARI or acute exacerbation of COPD symptoms, and during follow-up illness visits. Samples were considered stable if collected at least 30 days from the last day of hospitalization or from the last ARI or acute exacerbation event if it did not require hospitalization. Acute exacerbation samples were collected within 72 h of an event, additional samples were collected 4–30 days after an acute exacerbation event during unscheduled visits. |
| **Prognostic Factor**  **Measurement** | The bacterial microbiota in 1179 sputum samples was collected at stable, acute exacerbation and follow-up visits.  Subjects were asked to gargle with water immediately prior to sputum collection to reduce the number of oral bacteria. Subjects were asked to cough deeply and expectorate into a cup, mixed 1:1 with cold Transport Media and kept at -60 °C or below. |
| **Outcome measurement** | Exacerbation events and frequent exacerbations (2 or more exacerbation events per year) at 3 years of follow-up. |
| **Statistical analysis** | The analysis model is not explicitly described, although odds ratios reported are labelled as adjusted.  No description of the adjusted analysis. |

### Boutou 2014

| **Study ID** | **Boutou 2014** |
| --- | --- |
| **Objective** | To investigate whether the isolation of P. aeruginosa in the sputum of a general COPD population was associated with long-term mortality. |
| **Design** | Case-control study, Retrospective study |
| **Study participation** | Study population:  COPD patients (n=132)  Inclusion criteria:  NR  Exclusion criteria:  NR  Recruitment period and setting:  All patients were recruited from Royal Brompton Hospital (London, UK) between 2000-2012. |
| **Follow-up and data collection** | Demographic variables, lung function measurements, gas transfer data, arterial blood gases and exacerbation frequency during the year prior to entering the study were recorded for all patients. |
| **Prognostic Factor**  **Measurement** | All sputum specimen results were cross-correlated with patients listed on our COPD research audit database. The reason for obtaining a sputum culture was not recorded systematically, but included repeated exacerbations and deterioration in symptom severity and/or clinical status, as well as opportunistic collection from patients with chronic sputum production. The laboratory threshold for a culture to be considered P. aeruginosa positive was 200 CFU·mL-1 (a semi-quantitative method). |
| **Outcome measurement** | Mortality (duration of follow up not stated) |
| **Statistical analysis** | Initial matching was done according to three baseline variables (sex, age and FEV1 % predicted)  Cox proportional hazard regression models (graphically with Kaplan-Meier curves)  Adjusted analysis for known and suspected confounders: although statistical analyses were not adjusted, the case and control participants were matched by sex, age and FEV1 % predicted |

### Choi 2018

| **Study ID** | **Choi 2018** |
| --- | --- |
| **Objective** | To determine whether readmission of patients with severe AECOPD varies according to the bacterium identified. |
| **Design** | Retrospective study |
| **Study participation** | Study population:  Patients (n=104, after matching) diagnosed with severe AECOPD.  AECOPD was defined as “worsening of a patient’s respiratory symptoms beyond normal day-to-day variation.” Severe AECOPD was defined as AECOPD requiring hospitalization.  Inclusion criteria:  Events were included if the following criteria were met: 1) the patient had a previous spirometry that showed airway obstruction (a ratio of forced expiratory volume in the first second to forced vital capacity of <70% in post bronchodilator spirometry); 2) the patient was diagnosed with severe AECOPD; 3) the patient was discharged after treatment and continuously followed up; and 4) the patient was >40 years old.  Exclusion criteria:  NR  Recruitment period and setting:  All patients were recruited in Korea University Guro Hospital from January 2011 to May 2017. |
| **Follow-up and data collection** | Medical records were reviewed and analysed for the following data: age, gender, smoking history, comorbidities, Global Initiative for Chronic Obstructive Lung Disease (GOLD) stage, inhaler use, pulmonary oral medication use, use of home oxygen therapy, and culture and polymerase chain reaction (PCR) assay data for identification of the bacterium or virus. |
| **Prognostic Factor Measurement** | The three most frequently identified bacteria were analysed in the study. All cultures were performed within 24 hours of admission. |
| **Outcome measurement** | Events were divided in two groups: readmission (within 30 days after discharge) and no readmission (within 30 days after discharge). |
| **Statistical analysis** | Adjustments: propensity score matching  Multivariate logistic regression  Adjusted analysis for known and suspected confounders: variables associated with prognosis such as age, comorbidity (hypertension, diabetes, coronary artery disease, cerebrovascular accident), COPD severity, smoking history, length of hospital stay, intensive care unit admission, use of mechanical ventilation, use of non-invasive ventilation, inhaler use, oral medication use. |

### Eklöf 2020

| **Study ID** | **Eklöf 2020** |
| --- | --- |
| **Objective** | To determine whether P. aeruginosa is associated with increased risk of exacerbations or death in patients with COPD. |
| **Design** | Prospective study |
| **Study participation** | Study population:  Multiregional cohort study of COPD outpatients (n= 22053) with any microbiological data.  Inclusion criteria:  All patients who were registered with a visit to the outpatient clinic between 1 January 2010 and 31 October 2017 in the DrCOPD were included.  Exclusion criteria:  Patients with malignant neoplasms within 5 years prior to study entry were excluded since this condition is strongly associated with mortality and may affect the ability to interpret the results of the study exposure.  All patients from Eastern Denmark were included, regardless of microbiological status.  Recruitment period and setting:  Data from patients were retrieved from the nationwide Danish Register of Chronic Obstructive Pulmonary Disease (DrCOPD) between 1 January 2010 and 31 October 2017  The DrCOPD holds individual data on all outpatient visits and hospital admissions due to exacerbation of COPD, in patients aged 30 years or above, at all Danish hospitals since 2008.  Patients from the western part of Denmark were not included since we could not gain access to microbiological data for these patients. |
| **Follow-up and data collection** | Patient characteristics were assessed at study entry. Information was obtained from the DrCOPD and the Danish National Patient Registry (DNPR).  The DNPR holds data on all Danish in-hospital and out-patient-clinic contacts since 1977. |
| **Prognostic Factor**  **Measurement** | Exposure was defined as any P. aeruginosa-positive culture sample from the lower respiratory tract (i.e. sputum, tracheal secretion, bronchial secretion and bronchial alveolar lavage) after the study participant's entry date in the DrCOPD until end of follow-up on 31 October 2017. Exposure date was defined as the date of the first registered positive sample. |
| **Outcome measurement** | Combined endpoint of hospitalization for exacerbation or all-cause death, and all-cause death separately, respectively, after 2 years.  We chose to assess the outcome after 2 years since we expected a general low long-term survival rate in the study population based on previous national and international literature on mortality in COPD. Data on outcomes were retrieved from the DrCOPD and DNPR. Exacerbation was defined using the ICD-10 codes. |
| **Statistical analysis** | A greedy-matched propensity score model was applied as a sensitivity analysis, forming a subpopulation of patients with available microbiological data on culture samples from the lower respiratory tract. A second propensity score model, inverse probability of treatment weighting (IPTW) of propensity score, was additionally performed as a sensitivity analysis.  Cox proportional hazard regression models and cumulative incidence plots  Adjusted analysis for known and suspected confounders, assessed at study entry based on previous literature in the field: age (continuous), sex (male versus female), severity of airflow obstruction based on percentage predicted forced expiratory volume in the first second; forced expiratory volume (FEV1) (ordinal: 1e4), medical research council dyspnoea scale (MRC) (ordinal: 1-5), body mass index (BMI) (continuous), smoking status (active versus not active), previous hospitalization for exacerbation of COPD within 12 months prior to study entry (yes versus no), inhaled corticosteroid; ICS (yes versus no) and calendar year for entry in DrCOPD (ordinal: 2010-2017). Patients with unknown smoking status were classified as non-active smokers. No forward or backward variable selection was made. |

### Jacobs 2020

| **Study ID** | **Jacobs 2020** |
| --- | --- |
| **Objective** | To determine whether PA isolation is associated with mortality and changes in exacerbation and hospitalization rates within a longitudinal cohort of COPD outpatients |
| **Design** | Prospective study |
| **Study participation** | Study population:  Cohort of COPD stable or acute exacerbation outpatients (n=181)  Inclusion criteria:  NR  Exclusion criteria:  NR  Recruitment period and setting:  The COPD study clinic is a prospective study that started in 1994 at the Buffalo VA Medical Center (VAMC). |
| **Follow-up and data collection** | Participants were evaluated monthly and whenever they had symptoms suggestive of an exacerbation. At clinic visits, clinical information and sputum and serum samples were obtained. A clinical evaluation was performed at each visit to determine whether the patients had stable disease or an exacerbation. |
| **Prognostic Factor**  **Measurement** | Spontaneously expectorated morning sputum samples were homogenized in 0.1% dithiothreitol, and serial dilutions were subjected to quantitative culture. Bacterial identification was performed using standard techniques. Pseudomonas aeruginosa isolation was identified by colony morphology, the absence of lactose fermentation, and the presence of oxidase.  We further identified PA sputum culture-positive patients utilizing the microbiology records within the Buffalo VAMC electronic medical record (EMR). For the purposes of this study, patients were divided into 2 groups: those in whom PA was isolated in sputum (PA+) and those in whom PA was not isolated in sputum over the study period (PA−).  Exposure was defined as any PA+ sputum culture after the study participant’s entry date into the study until end of follow-up. Exposure date was defined as the date of the first PA+ sputum culture. |
| **Outcome measurement** | Mortality at 36 months follow up period.  Survival time was defined as the interval between study entry and the date of death or the date of final follow-up in the VAMC EMR (May 31, 2017).  Exacerbation rates and hospitalization rates per 100 person-month, including COPD-related hospitalizations  Only patients with complete data over the 36-month period were included (n = 133). |
| **Statistical analysis** | Cox proportional hazard regression models (Kaplan-Meier survival curves and the log-rank test)  Adjusted analysis for known and suspected confounders  Based on a review of the literature, the following patient characteristics were investigated as confounders in the model: age, race, smoking status (current vs. former), participant follow-up in primary study, Charlson comorbidity index, and FEV1% predicted. |

### Martínez-García 2021

| **Study ID** | **Martínez-García 2021** |
| --- | --- |
| **Objective** | To investigate risk factors for new acquisition and persistence of PA infection and their relationship with all-cause mortality in patients with COPD. |
| **Design** | Prospective study |
| **Study participation** | Study population:  Cohort of consecutive COPD patients (GOLD II-IV) (n=170) who were free of previous PA isolation and followed up every 3-6 months for 85 months (50.25-110.25 months).  Inclusion criteria:  Patients with GOLD II-IV COPD according to the Global Initiative for Chronic Obstructive Lung Disease criteria, who were able to provide spontaneous valid sputum samples for bacterial culture.  Exclusion criteria:  Patients in whom PA had been isolated before recruitment were excluded. Likewise, patients with primary diagnosis of bronchiectasis or asthma were excluded too.  Recruitment period and setting:  COPD patients were recruited between January 2004 and February 2007 in two tertiary COPD outpatient clinics in Spain followed-up every 3–6 months, depending on the severity of their clinical condition, until the end of 2015. |
| **Follow-up and data collection** | All measurements were obtained in clinically stable conditions (at least 6 weeks from an exacerbation, if any). |
| **Prognostic Factor**  **Measurement** | At each clinical visit, patients were asked to provide at least two sputum samples for microbiological assessment. Briefly, patients were taught to collect sputum samples at home using the most sterile technique possible and were asked to bring these samples to hospital within less than 3 h after collection. Only sputum samples with <25 squamous epithelial cells and >25 leukocytes per high-powered field were processed further. In these samples, sputum was separated from saliva, Gram stained, and homogenized, and diluted secretions were plated on blood, chocolate, McConkey, and Saboreaud agar. A cut-off point of >10^3 CFU was used to identify abnormal positive culture results for PA or other PPM (e.g.Haemophilus influenzae – HI). |
| **Outcome measurement** | Standardized protocols in all patients at all clinical visits were used to record symptoms, exacerbations and hospitalizations.  Annual exacerbation rates (total, moderate and severe) at 85 follow up period:  Moderate COPD exacerbations were defined by the increase in at least 2 cardinal symptoms (dyspnoea, sputum quantity or purulence) requiring oral antibiotic and/or short course of oral steroids therapy. Severe COPD exacerbations were defined as those requiring hospitalization.  All-cause mortality |
| **Statistical analysis** | Cox proportional hazard regression analysis (Kaplan Meier survival curves)  Adjusted analysis for known and suspected confounders:  The statistically significant variables identified by the bivariate analysis between groups were included in the models, but they are not listed in the paper. In addition, a forward stepwise technique (Wald test) that removed variables with p>0.1 from the final model was used. |

### Rodrigo-Troyano 2018

| **Study ID** | **Rodrigo-Troyano 2018** |
| --- | --- |
| **Objective** | To determine prevalence, risk factors, antibiotic susceptibility patterns and impact on outcomes of PA in a prospective cohort of COPD patients identified at the time they become frequently hospitalized exacerbators. |
| **Design** | Prospective study |
| **Study participation** | Study population:  Cohort of COPD patients with frequent hospitalized exacerbations (FHE) (n =207), followed-up for 12 months after hospital discharge.  Diagnosis of COPD was confirmed by a forced spirometry showing post-bronchodilator forced expiratory volume in 1 s/forced vital capacity ratio ≤70%.  Exacerbation was defined as an acute event characterized by worsening of the patient’s respiratory symptoms that is beyond normal day-to-day variations and leads to a change in medications requiring hospitalization.  Inclusion criteria:  COPD patients with FHE, defined as COPD patients admitted for the second exacerbation period within 12 months of the initial one.  Exclusion criteria:  Exclusion criteria included other airway diseases as primary diagnosis (such as bronchiectasis not related to COPD, asthma and/or interstitial lung diseases), pneumonia or heart failure at admission. Patients with a new prescription of chronic treatment with macrolides in the last year and patients with a suspected underlying malignancy or pre-existing medical condition with a life expectancy of less than 6 months were also excluded.  Recruitment period and setting:  A prospective multicentre observational study was conducted in 3 hospitals in Spain (Hospital de la Santa Creu i Sant Pau, Barcelona, Complejo Hospitalario Universitario de A Coruña, A Coruña, and Hospital Comarcal de Mollet, Mollet del Vallés) from March 2012 to March 2015. |
| **Follow-up and data collection** | Information collected included demographic data, co-morbid conditions, current treatments, smoking history, functional status, number of exacerbations during the last year, previous isolation of PA and prior antibiotic and corticosteroids treatment. Clinical signs including Anthonisen criteria, laboratory tests and radiology results were assessed at the time of hospital admission.  Patients were followed-up for 12 months after hospital discharge, from event reports by electronic records of each hospital. |
| **Prognostic Factor**  **Measurement** | Spontaneous sputum culture was collected during the first 48 h of admission. Samples were processed and antimicrobial susceptibility testing was performed as previously described.  Good quality samples were defined as < 10 squamous epithelial cells and > 25 leukocytes per field and only potential pathogenic microorganisms (PPMs) were evaluated.  PA was classified as resistant (PAR) when it was not susceptible to at least one of the following antibiotic classes: antipseudomonal fluoroquinolones, antipseudomonal cephalosporins, antipseudomonal penicillins plus beta-lactamase inhibitors, antipseudomonal carbapenems, aminoglycosides, monobactams and polymixins.  The presence of PA was evaluated at 3, 6, 9 and 12 months.  Information of PA isolations in sputum during the previous year was also registered.  For the purpose of the study, patients were divided in 2 groups according to the presence of PA in the sputum culture at admission.  Patients with isolation of PA were assigned to the PA group and patients with no PPMs isolation in the sputum culture were assigned to the non-PPMs group. Patients with isolation of other PPMs different from PA were excluded from the comparative analysis due to the small sample and its heterogeneity. |
| **Outcome measurement** | Outcomes evaluated were short (30- and 90-day) and long-term (180- and 365-day) readmissions and mortality, time to first readmission, and number of hospital readmissions/ days of follow-up 1000 days (>= 2 and >= 3 readmissions during the follow-up ).  Readmission was considered a new hospital admission due to an exacerbation after hospital discharge. Mortality was analysed as death from all causes from the first day of admission to completion of 1-year follow-up. |
| **Statistical analysis** | Logistic regression analyses  Unadjusted analysis for known and suspected confounders. |

**Table S4.** Summary results for risk of bias of the included studies

|  | Study Participation | Study Attrition | Prognostic Factor  Measurement | Outcome assessment (exacerbations) | Outcome assessment (hospitalizations) | Outcome assessment (mortality) | Study Confounding | Statistical Analysis and  Reporting |
| --- | --- | --- | --- | --- | --- | --- | --- | --- |
| Almagro, 2012 | **L** | **L** | **L** | NA | **M** | **M** | **H** | **L** |
| Bouquet , 2020 | **L** | **M** | **L** | **M** | NA | NA | **H** | **L** |
| Boutou, 2014 | **M** | **H** | **L** | NA | NA | **M** | **H** | **M** |
| Choi, 2018 | **L** | **M** | **L** | NA | **M** | NA | **H** | **L** |
| Eklöf, 2020 | **L** | **L** | **L** | NA | **L** | **L** | **M** | **L** |
| Jacobs, 2020 | **L** | **M** | **L** | **L** | **M** | **M** | **M** | **L** |
| Martínez-García, 2021 | **L** | **L** | **L** | **L** | **M** | **M** | **L** | **L** |
| Rodriguez-Troyano, 2018 | **L** | **M** | **L** | NA | **M** | **M** | **H** | **L** |

**Footnote:** Domains indicated by a “**L**“ potentially have a low risk of bias; Domains indicated by a “**M**“ potentially have a moderate risk of bias; Domains indicated by a “**H**“ potentially have a high risk of bias; Domains indicated by an “**NA**“ did not measure this outcome. According to ref. 24.

## Table S5. Quality of evidence assessment

| **Certainty assessment** | | | | | | **Study event rate (%)** | | **Effect estimate** | | **Overall certainty of evidence** |
| --- | --- | --- | --- | --- | --- | --- | --- | --- | --- | --- |
| **№ of participants (studies)** | **Risk of bias** | **Inconsistency** | **Indirectness** | **Imprecision** | **Other considerations** | **Presence of Pseudomonas** | **Control group (no pseudomonas)** | **Relative (95% CI)** | **Absolute (95% CI)1** |
| **Mortality – (follow up 24 to 56 months)** | | | | | | | | | | |
| 22.823 (6 observational) | not seriousa | not seriousb | not serious | not serious | serious c | 502/1135  (44.23%) | 3817/21688  (17.6%) | **HR 1.83** (1.30 to 2.57) | **146 more deaths per 1.000** (from 53 more to 276 more) | ⨁⨁⨁◯ MODERATE |
| **Time to hospitalization – (follow up 24 to 56 months)** | | | | | | | | | | |
| 22.260 (2 observational) | seriousd | not seriouse | not serious | seriousf | serious c | **Eklöf 2020:** Adjusted risk of the composite outcome of time to hospitalization for COPD or all-cause death (HR 2.8, 95%CI 2.2-3.6)  **Rodrigo-Troyano 2018:** Unadjusted risk of time to first readmission (HR 0.95, 95%CI 0.53-1.68) | | | | ⨁◯◯◯ VERY LOW |
| **Risk of readmission – (follow up 30 days to 24 months)** | | | | | | | | | | |
| 311 (2 observational) | seriousg | not serious | not serious | seriousf | serious c | **Rodrigo-Troyano 2018:** Unadjusted proportion of patients with one readmission in PA vs. no-PA groups (79% vs. 75%, p=0.9); Unadjusted proportion of patients with >=3 readmissions (33% vs. 11%, p=0.01) (1 year follow-up)  **Choi 2018:** Adjusted of being readmitted within 30 days of a discharge from AECOPD (OR 4.749, 95%CI: 1.296 – 17.401) | | | | ⨁◯◯◯ VERY LOW |

| **Number of readmissions – (follow up 12 to 84 months)** | | | | | | | |
| --- | --- | --- | --- | --- | --- | --- | --- |
| 739 (4 observational) | seriousg | not serious | not serious | seriousf | serious c | **Almagro 2012:** Unadjusted mean number of readmissions (1.3±1.5 vs. 1.2 ±1.6, p=0.8).  **Rodrigo-Troyano 2018:** Unadjusted median number of readmissions/1000 days of follow-up (2.7 vs. 2.7, p=0.7)  **Jacobs 2020:** Unadjusted COPD-related hospitalization rates per 100 persons-month (rate 1.87 (95%CI 1.22–2.74) vs. 0.89 (95%CI 0.51–1.44), p=0.02). Unadjusted rate ratio 1.15, 95%CI: 1.59-2.78  **Martínez-García 2021:** Unadjusted mean number of severe exacerbations requiring hospitalization (0.76 ± 1.0 vs. 0.23 ± 0.4, p= 0.003) | ⨁◯◯◯ VERY LOW |
| **Exacerbations rate – (follow up 24 to 84 months)** | | | | | | | |
| 758 (4 observational) | seriousg | not serious | not serious | seriousf | serious c | **Bouquet 2020:** adjusted exacerbation events (OR 1.20, 95%CI: 1.03-1.39); frequent exacerbations (>=2/y) (OR 1.48, 95%CI: 1.31-1.68)  **Jacobs 2020:** exacerbation rates per 100 person-month (15.7 vs. 7.5, p<0.001)  **Martínez-García 2021:** annual total exacerbation rates (1.87 ± 1.3 vs. 0.84 ± 0.8, p= 0.009); annual moderate exacerbation rates (1.11 ± 1.3 vs. 0.61 ± 0.9, p= 0.01)  **Rodrigo-Troyano 2018:** non-hospitalized exacerbations (1 vs. 1, p=0.8) | ⨁◯◯◯ VERY LOW |

CI: confidence interval; HR: hazard ratio; OR: odds ration; COPD: chronic obstructive pulmonary disease

**Explanations for the certainty of evidence:**

1. **Not downgraded for risk of bias:** although three out of six studies were considered at a high risk of bias due to study confounding (failed to adjust for one or more crucial predictors), sensitivity analysis of the data excluding high risk of bias studies did not change substantially the overall point estimate. Robustness of the data was further confirmed in a worse-case test scenario where a hypothetical negative study with similar size to that of Eklöf 2020 and no association between exposure and outcome, was added to the meta-analysis, with no changes in the overall conclusion regarding the existence of a meaningful association between the exposure and the outcome.
2. **Not downgraded for inconsistency:** although the I2 was 78% (p=0,0004) results from all studies revealed some degree of association.
3. **Downgraded for potential publication bias:** the selection of studies considered those in which the assessment of the prognostic factor of interest was the main objective thus certain over-estimation of the association cannot be ruled out.
4. **Concerns about risk of bias:** data from one high and one moderate risk of bias studies due to study confounding (failed to adjust for one or more crucial predictors). Variability of outcome measurement and / or definition prevented meta-analysis therefore sensitivity analysis and robustness of the data could not be tested.
5. **Not downgraded for inconsistency:** although the included studies inform about differential association, it is probably due to variability of outcome measurement and / or definition which has been considered under imprecision.
6. **Downgraded for imprecision:** variability of outcome measurement and / or definition prevented meta-analysis. Point effect estimates and 95%CI not known.
7. **Concerns about risk of bias:** due to high risk of bias due to study confounding (most included studies failed to adjust for one or more crucial predictors: age, severity and presence of bronchiectasis)

**Explanations of the evidence profile table**

1. Interpretation of the absolute effect estimates is limited because they have been obtained from unadjusted absolute numbers of events from populations with and without the risk factor and cannot be interpreted as a time to event outcome.
